# Supplementary material for: All-iron redox flow battery in flow-through and flow-over set-ups: the critical role of cell configuration
Source: Royal Society of Chemistry journal article supplement (doi:10.1039/d4ya00179f), 2024-01-01
Supplement: d4ya00179f1.pdf [file d4ya00179f1.pdf]

# All-iron redox flow battery in flow-through and flow-over set-ups: the critical role of cell configuration

Josh J. Bailey,<sup>a</sup> Maedeh Pahlevaninezhad,<sup>b</sup> H. Q. Nimal Gunaratne,<sup>a</sup> Hugh O'Connor,<sup>a</sup> Kate Thompson,<sup>a</sup> Pranav Sharda,<sup>a</sup> Paul Kavanagh,<sup>a</sup> Oana M. Istrate,<sup>c</sup> Stephen Glover,<sup>c</sup> Peter A. A. Klusener,<sup>d</sup> Edward P. L. Roberts,<sup>\*b</sup> Peter Nockemann.<sup>\*a</sup>

## Supplementary Information

### Solubility

Ultraviolet-visible (UV-Vis) spectroscopy and inductively coupled plasma-optical emission spectroscopy (ICP-OES) were used to characterise the solubility of pure  $\text{Na}_4\text{Fe}(\text{CN})_6$  and  $\text{K}_4\text{Fe}(\text{CN})_6$  for comparison with literature values. A saturated solution of  $\text{Na}_4\text{Fe}(\text{CN})_6$  (prepared from a mixture of 0.1 mol of the salt in 100 mL of deionized water) demonstrated concentrations of 0.50 M by UV-Vis and 0.54 M by ICP-OES, which compare well with literature reports of 0.56 M.<sup>68</sup> When repeated for  $\text{K}_4\text{Fe}(\text{CN})_6$ , values of 0.72 M and 0.67 M were observed by UV-Vis and ICP-OES, respectively, slightly below the value of 0.76 M reported previously.<sup>68</sup>

### Density and viscosity

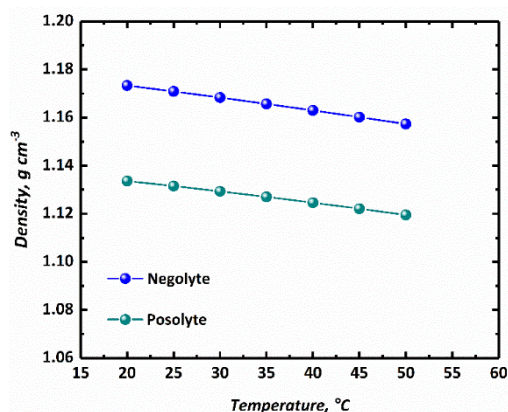

Figure S1: Densities of posolyte (0.25 M  $\text{Na}_4[\text{Fe}(\text{CN})_6]$ , 0.25 M  $\text{K}_4[\text{Fe}(\text{CN})_6]$ , 1.00 M NaCl) and negolyte (0.50 M  $\text{FeCl}_3$ , 1.00 M BIS-TRIS, 2.50 M NaOH) as a function of temperature.

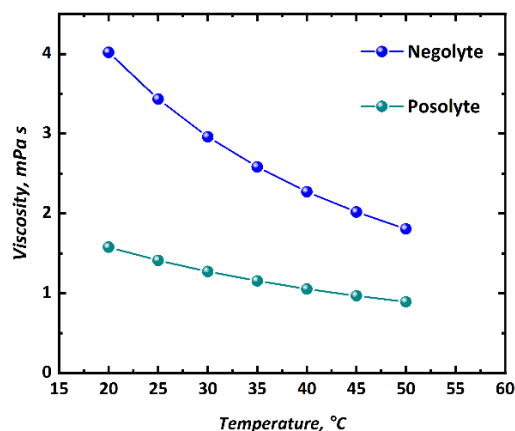

Figure S2: Viscosities of posolyte (0.25 M  $\text{Na}_4[\text{Fe}(\text{CN})_6]$ , 0.25 M  $\text{K}_4[\text{Fe}(\text{CN})_6]$ , 1.00 M NaCl) and negolyte (0.50 M  $\text{FeCl}_3$ , 1.00 M BIS-TRIS, 2.50 M NaOH) as a function of temperature.

Table S1: Negolyte (0.50 M  $\text{FeCl}_3$ , 1.00 M BIS-TRIS, 2.50 M NaOH) density and viscosity as a function of temperature.

| Temp. (°C) | Density (g cm <sup>-3</sup> ) | Dyn. Viscosity (mPa·s) | Kin. Viscosity (mm <sup>2</sup> s <sup>-1</sup> ) |
|------------|-------------------------------|------------------------|---------------------------------------------------|
| 20         | 1.17334                       | 4.021                  | 3.427                                             |
| 25         | 1.17090                       | 3.433                  | 2.932                                             |
| 30         | 1.16834                       | 2.960                  | 2.534                                             |
| 35         | 1.16570                       | 2.583                  | 2.216                                             |
| 40         | 1.16299                       | 2.272                  | 1.953                                             |
| 45         | 1.16020                       | 2.018                  | 1.740                                             |
| 50         | 1.15734                       | 1.806                  | 1.561                                             |

Table S2: Posolyte 0.25 M  $\text{Na}_4[\text{Fe}(\text{CN})_6]$ , 0.25 M  $\text{K}_4[\text{Fe}(\text{CN})_6]$ , 1.00 M NaCl) density and viscosity as a function of temperature.

| Temp. (°C) | Density (g cm <sup>-3</sup> ) | Dyn. Viscosity (mPa·s) | Kin. Viscosity (mm <sup>2</sup> s <sup>-1</sup> ) |
|------------|-------------------------------|------------------------|---------------------------------------------------|
| 20         | 1.13360                       | 1.577                  | 1.391                                             |
| 25         | 1.13153                       | 1.413                  | 1.249                                             |
| 30         | 1.12933                       | 1.272                  | 1.126                                             |
| 35         | 1.12702                       | 1.154                  | 1.024                                             |
| 40         | 1.12462                       | 1.053                  | 0.936                                             |
| 45         | 1.12212                       | 0.967                  | 0.862                                             |
| 50         | 1.11951                       | 0.893                  | 0.798                                             |

### Cross-over

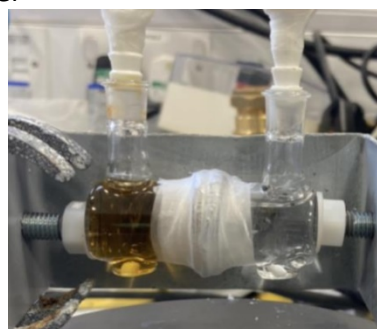

Figure S3: H-Cell set-up used to measure cross-over of negolyte.

Table S3: Iron concentrations by ICP-OES, as a function of time, of 110-times-diluted samples from the deficient side of the H-cell set-up.

| Time (h) | Measured Fe concentration in diluted ICP-OES sample (ppm) | Calculated Fe concentration in electrolyte (M) |
|----------|-----------------------------------------------------------|------------------------------------------------|
| 1        | 0.64                                                      | 1.26E-4                                        |
| 2        | 0.43                                                      | 8.47E-5                                        |
| 3        | 0.40                                                      | 7.88E-5                                        |
| 4        | 0.36                                                      | 7.09E-5                                        |
| 68       | 0.46                                                      | 9.06E-5                                        |
| 69       | 0.41                                                      | 8.08E-5                                        |
| 70       | 0.41                                                      | 8.08E-5                                        |
| 71       | 0.41                                                      | 8.08E-5                                        |

Table S4: Differences between studies carried out by Shin et al. (2022) and the studies carried out in this work.

|                                          | <b>Shin <i>et al.</i> 2022</b>                  | <b>Bailey <i>et al.</i> 2024</b> | <b>Comment</b>                                                                                                 |
|------------------------------------------|-------------------------------------------------|----------------------------------|----------------------------------------------------------------------------------------------------------------|
| <b>Starting material</b>                 | Fe <sub>2</sub> (SO <sub>4</sub> ) <sub>3</sub> | FeCl <sub>3</sub>                | May affect complex formed.                                                                                     |
| <b>OCV</b>                               | 1.43 V                                          | 1.28 V                           | Consistent with a different complex.                                                                           |
| <b>Concentration</b>                     | 0.5 M                                           | 0.5 M                            | Unchanged.                                                                                                     |
| <b>M:L:B</b>                             | 1:2:8.6                                         | 1:2:5                            | Assuming x=7.4 for hydrate.<br>This could also affect the complex formed.                                      |
| <b>Ppt removed</b>                       | Yes                                             | No                               | None formed <i>via</i> chloride.                                                                               |
| <b>[Fe(CN)]<sup>3-</sup> in posolyte</b> | Yes                                             | No                               | 0.3 M ferricyanide highly likely to be contributing to stability.                                              |
| <b>Configuration</b>                     | Flow-through                                    | Flow-through                     | Unchanged.                                                                                                     |
| <b>Tank volumes</b>                      | 16 mL                                           | 25 mL                            | Longer cycles will adversely affect our stability.                                                             |
| <b>Flow rate</b>                         | 23 mL min <sup>-1</sup>                         | 50 mL min <sup>-1</sup>          | Significantly higher in our case.                                                                              |
| <b>Active area</b>                       | 4 cm <sup>2</sup>                               | 5 cm <sup>2</sup>                | Similar.                                                                                                       |
| <b>Electrode Thickness</b>               | 4.6 mm                                          | 6.5 mm                           | Multiple electrode pieces used in our cell due to design.                                                      |
| <b>Compression ratio</b>                 | N/A                                             | <i>ca.</i> 53%                   | Not known how compressed their felt was.                                                                       |
| <b>Current density</b>                   | 80 mA cm <sup>-2</sup>                          | 60 mA cm <sup>-2</sup>           | Highest current density at which both configurations in this work could be cycled was 60 mA cm <sup>-2</sup> . |

M = metal; L = ligand; B = base
